# Supplementary material for: Enhanced photocatalytic performance of ZnIn2S4/g-C3N4/WO3 ternary dual S-Scheme heterojunctions for polymer wastewater purification
Source: Research Square preprint supplement (doi:10.21203/rs.3.rs-7909662/v1), 2025-11-05
Supplement: Supplementary file 1 [file 8304253698f3652b1f0deda1.docx]

**Supplementary Material**

**Enhanced photocatalytic performance of ZnIn2S4/g-C3N4/WO3 ternary dual S-Scheme heterojunctions for polymer wastewater purification**

Deng Gu a, Yang Bai a*, Jianing He a, Xian Chen a, b**, Daoxiong Li a, Lingfeng Wu a, and Xinrong Li a

a State Key Laboratory of Oil and Gas Reservoir Geology and Exploitation, School of Oil and Natural Gas Engineering, Southwest Petroleum University, Chengdu, 610500, China;

b School of Chemistry and Materials Science & Key Laboratory of Functional Inorganic Material Chemistry, Heilongjiang University, Harbin, 150080, China.

*Correspondence:

201499010100@swpu.edu.cn (Yang Bai); chenxian929@foxmail.com(Xian Chen)

**Pre-prepared reagents：**

1, Slowly add 100 mL of sulfuric acid to 900 mL of water along the inner wall of a beaker, stir thoroughly, and allow the solution to cool for later use.

2, Add 5.0 g of silver sulfate to 500 mL of the sulfuric acid prepared above, let it stand for 1–2 days, and stir until dissolved.

3, Gradually add 48.0 g of mercuric sulfate, in portions, to 200 mL of the sulfuric acid solution prepared above, stirring until dissolved.

4, (Potassium Dichromate Standard Solution: C(1/6 K2Cr2O7) = 0.500 mol/L.)

Dry the potassium dichromate at 120°C ± 2°C to a constant weight. Weigh 24.5154 g of potassium dichromate into a beaker, add 600 mL of water, and slowly add 100 mL of the sulfuric acid prepared above while stirring until dissolved. After cooling, transfer the solution to a 1000 mL volumetric flask and dilute to the mark with water, then mix well.

5, (Potassium Dichromate Standard Solution: C(1/6 K2Cr2O7) = 0.160 mol/L.)

Dry the potassium dichromate at 120°C ± 2°C to a constant weight. Weigh 7.8449 g of potassium dichromate into a beaker, add 600 mL of water, and slowly add 100 mL of sulfuric acid while stirring until dissolved. After cooling, transfer the solution to a 1000 mL volumetric flask and dilute to the mark with water, then mix well. This solution can be stored stably for up to 6 months.

6, Potassium Dichromate Standard Solution: C(1/6 K2Cr2O7) = 0.120 mol/L.

Dry the potassium dichromate at 120°C ± 2°C to a constant weight. Weigh 5.8837 g of potassium dichromate into a beaker, add 600 mL of water, and slowly add 100 mL of sulfuric acid while stirring until dissolved. After cooling, transfer the solution to a 1000 mL volumetric flask and dilute to the mark with water, then mix well. This solution can be stored stably for up to 6 months.

**Supporting Figures and Tables**

Table S1. Specific surface area and pore structure characteristic data.

| Sample | Surface Area (m2/g) | Pore Volume (cm3/g) | Pore Size (nm) |
| --- | --- | --- | --- |
| ZIS | 66.037 | 0.410 | 5.054 |
| CN | 44.761 | 0.197 | 5.001 |
| ZIS/CN | 69.901 | 0.294 | 4.328 |
| WO3 | 40.364 | 0.207 | 4.097 |
| ZIS/CN/WO3 | 70.613 | 0.316 | 5.160 |

Table S2. The fitting parameters of TRPL decay curves in Figure 7I.

| Sample | τ1 (ns) | τ2 (ns) | A1 | A2 | τavg (ns) |
| --- | --- | --- | --- | --- | --- |
| ZIS | 1.80075 | 7.73014 | 130.25945 | 0.55098 | 1.91 |
| CN | 1.77496 | 6.97538 | 174.35967 | 0.87476 | 1.88 |
| ZIS/CN | 1.86484 | 7.41982 | 128.97066 | 0.64189 | 1.98 |
| WO3 | 1.54621 | 5.10945 | 47.91534 | 0.24901 | 1.62 |
| ZIS/CN/WO3 | 1.99079 | 6.84631 | 94.15522 | 1.41719 | 2.23 |

Comment : τavg = (A1τ12 + A2τ22) / (A1τ1 + A2τ2)

Table S2. Values of elements in equivalent circuit resulted from fitting the EIS data in Figure 7D.

| Sample | Rs (Ω cm-2) | Rct (Ω cm-2) | CPE (F cm-2) |
| --- | --- | --- | --- |
| WO3 | 48.31 | 15325 | 1.1412E-5 |
| CN | 44.92 | 13015 | 1.1544E-5 |
| ZIS | 43.81 | 7794 | 1.5617E-5 |
| ZIS/CN | 41.27 | 7463 | 1.3105E-5 |
| ZIS/CN/WO3 | 34.97 | 6105 | 1.8631E-5 |
